# Supplementary material
Source: ML conference proceedings conference paper supplement (https://openaccess.thecvf.com/content/CVPR2023/html/Kong_Indescribable_Multi-Modal_Spatial_CVPR_2023_paper.html)
Supplement: Supplementary file 1 [file Kong_Indescribable_Multi-Modal_Spatial_CVPR_2023_supplemental.pdf]

# Indescribable Multi-modal Spatial Evaluator

Lingke Kong  
Manteia Tech

kid\_liet@163.com

Jiacheng Wang  
Xiamen University

jiachengw@stu.xmu.edu

X. Sharon Qi

University of California, Los Angeles

xqi@mednet.ucla.edu

Jingyi Zhang  
Xiamen University

zhangjingyi1@stu.xmu.edu.cn

Qijin Shen

Fuzhou University

qijinshen@foxmail.com

Yanle Hu\*  
Mayo Clinic Arizona

Hu.Yanle@mayo.edu

Qichao Zhou\*  
Manteia Tech

zhouqc@manteiatech.com

## 1. Training Details

All the experiments were implemented in Pytorch software on 64-bit Ubuntu Linux system with 96GB RAM and 24GB Nvidia Titan RTX GPU. All the images were normalized to  $[-1, 1]$ . We train all methods using the Adam optimizer with the learning rate of  $1e-4$  and  $(\beta_1, \beta_2) = (0.5, 0.999)$ . In the case of 2D and 3D, the batch size is set to 8 and 1 respectively, and the weight decay is  $1e-4$ . The weight of all similarity losses is set to 1.

**Normalized Cross-correlation (NCC)** is used to describe the correlation between two vectors or samples of the same dimension. As shown in Eq 1.

$$\frac{1}{N} \sum_{x,y} \frac{1}{\sigma_f \sigma_t} (f(x,y) - \mu_f)(t(x,y) - \mu_t) \quad (1)$$

Where,  $f()$  and  $t()$  are two vectors or samples, and  $n$  is vector dimension or window size,  $\sigma$  is the standard deviation of various samples,  $\mu$  is the mean value of each sample.

**Mutual Information(MI)** is used to describe the degree of interdependence between variables. As shown in Eq 2.

$$\sum_{x,y} p(x,y) \log \frac{p(x,y)}{p(x)p(y)} \quad (2)$$

$p(x)$  and  $p(y)$  are the probability distributions of values in X and Y, respectively.

**Modal Independent Neighborhood Descriptor(MIND)** is used to describe the local modal characteristics around each voxel. First,  $D_p$  is defined as the similarity measure between image patches.

$$D_p(I, x_1, x_2) = \frac{1}{|P|} \sum_t (I(x_1 + t) - I(x_2 + t))^2 \quad (3)$$

\*Corresponding author.

$I$  is the image,  $x_1$  and  $x_2$  are the two locations in the image, and  $P$  is the displacement set from voxel with patch size  $p * p * p$  to the center of the patch. Therefore,  $D_p$  calculates the mean square deviation between two image patches centered on  $x_1$  and  $x_2$ . Next is the definition of MIND:

$$MIND_p(I, x, r) = \exp\left(\frac{-D_p(I, x, x + r)}{V(I, x)}\right) \quad (4)$$

Where  $r$  is the distance vector.  $V(I, x)$  is the evaluation of local variance. We make MIND a Gaussian function of  $D_p$ , that is, low response when patches are not similar, and high response when patches are similar. Finally, we want to align the mean value of the absolute difference between the MIND of the two images.

$$\frac{1}{|R|} \sum_r |MIND(A, x, r) - MIND(B, x, r)| \quad (5)$$

**CycleGAN** uses two downsampling convolution blocks, nine residual blocks, two up-sampling deconvolution blocks and four discriminator layers. The CycleGAN was developed which was based on the assumption that the generator  $G$  from the source domain  $X$  to the target domain  $Y$  ( $G : X \rightarrow Y$ ) was the reverse of the generator  $F$  from  $Y$  to  $X$  ( $F : Y \rightarrow X$ ).

$$\min_G \min_F \mathcal{L}_{Cyc}(G, F) = \mathbb{E}_x [\|F(G(x)) - x\|_1] + \mathbb{E}_y [\|G(F(y)) - y\|_1] \quad (6)$$

$$\min_G \max_D \mathcal{L}_{Adv}(G, D) = \mathbb{E}_y [\log(D(y))] + \mathbb{E}_x [\log(1 - D(G(x)))] \quad (7)$$

**RegGAN** based on "loss-correction" shown in Eq 8. The solution corrects the output of the generator  $G(x_n)$  by modeling a noise transition  $\phi$  to match the noise distribution. Previously. Also, the RegGAN add the adversarial loss between the generator and the discriminator (Eq 7),

$$\hat{G} = \arg \min_G \frac{1}{N} \sum_{n=1}^N \mathcal{L}(\phi \circ G(x_n), \tilde{y}_n) \quad (8)$$

## 2. Weight of smooth loss

In addition to smoothness loss weight, all our comparison methods adopt the same network structure and the same parameter settings. Because the loss magnitude obtained by different methods of calculating similarity is also different, it is necessary to adjust the ratio between similarity and smoothness for each method. The settings are shown in Table 1.

| Method    |     |    |      |          |        |      |
|-----------|-----|----|------|----------|--------|------|
| Weight    | NCC | MI | MIND | CycleGAN | RegGAN | IMSE |
| $\lambda$ | 5   | 8  | 1    | 1        | 1      | 1    |

Table 1. Different smoothness loss weights for different methods.
